# Supplementary material for: Selectivity for TP53 signalling drives the mode of action of a highly potent N,O,O-tridentate naphthoquinone-based organo-ruthenium anticancer drug candidate
Source: Chem Sci. 2025 Jul 14;16(34):15652–65. doi: 10.1039/d5sc00735f (PMC12320299; doi:10.1039/d5sc00735f)
Supplement: SC-016-D5SC00735F-s002 [file SC-016-D5SC00735F-s002.xlsx]

## Sheet: Table regulome data
Compound 1a					Compound 2a					Compound 1b					Compound 2b
GO BPs	CYT	NE	# Proteins		GO BPs	CYT	NE	# Proteins		GO BPs	CYT	NE	# Proteins		GO BPs	CYT	NE	# Proteins
Positive regulation of DNA-templated transcription	-6.15755	-8.85941	32		Translation	-61.1921	-4.87792	49		Positive regulation of DNA-templated transcription	-4.12867	71.7748	125		Positive regulation of DNA-templated transcription	-7.82676	112.415	147
Proteasome-mediated ubiquitin-dependent protein catabolic process	2.50511	42.0108	27		Proteasome-mediated ubiquitin-dependent protein catabolic process	2.56481	45.2832	43		Negative regulation of DNA-templated transcription	-4.66829	65.6122	87		Chromatin remodeling	-6.66526	109.132	125
Translation	-14.3359	2.91921	24		Negative regulation of apoptotic process	3.78139	2.61589	36		DNA repair	-5.70979	35.204	65		Negative regulation of DNA-templated transcription	-5.9852	92.423	99
Cell cycle	0.304881	-6.11155	18		Protein transport	-1.67758	1.56862	33		Cell division	1.81697	26.931	64		Cell division	1.20938	40.3826	90
rRNA processing	-2.956	12.4225	11		Protein folding	12.2519	2.09792	19		DNA damage response	-1.27133	22.6014	59		mRNA splicing, via spliceosome	2.07143	72.9266	85
Ribosomal small subunit biogenesis	0	15.3924	10		rRNA processing	-20.3972	-2.04217	18		mRNA processing	2.79197	25.4259	54		Chromatin organization	-7.62158	89.2942	83
Double-strand break repair	-4.1391	-4.01604	10		Negative regulation of translation	-16.9153	1.87815	17		Cell cycle	-2.02069	26.1297	53		mRNA processing	-0.66564	47.4276	78
mRNA transport	-1.14018	5.09569	10		mRNA processing	-0.15373	1.70509	15		Protein transport	-4.12254	-9.80664	53		DNA repair	-4.34943	59.1448	71
DNA replication	0.442069	-6.00488	10		Cellular response to heat	12.5083	8.72517	14		mRNA splicing, via spliceosome	5.77477	37.9319	52		RNA splicing	-1.87677	49.7457	70
Stress granule assembly	-2.82895	0.946082	8		Response to oxidative stress	3.27451	-0.723996	14		Intracellular protein transport	-1.19396	-31.2	52		rRNA processing	5.47078	74.5407	66
DNA unwinding involved in DNA replication	0.518408	-4.77977	7		Protein K48-linked ubiquitination	-5.48848	-1.15082	13		Proteasome-mediated ubiquitin-dependent protein catabolic process	0.556125	26.0395	50		DNA damage response	1.78541	37.0913	65
Ribosome biogenesis	-1.1706	3.79365	6		Cellular response to oxidative stress	2.82433	-0.115758	13		RNA splicing	2.70711	29.0368	48		Protein transport	1.65849	-19.6096	58
					Macroautophagy	10.5094	4.82547	12		rRNA processing	6.90569	40.4306	47		Proteasome-mediated ubiquitin-dependent protein catabolic process	-0.330467	47.3729	57
					Ribosomal small subunit biogenesis	-13.8098	-1.30151	12		Protein stabilization	1.42037	-4.73391	46		Intracellular protein transport	4.412	-37.5954	54
					Stress granule assembly	-9.94548	3.00571	11		Chromatin organization	-9.61452	27.9811	44		Protein stabilization	5.3639	-0.925937	50
					DNA replication	-1.08181	-7.2128	10		Regulation of apoptotic process	-0.931128	4.60318	39		Transcription by RNA polymerase II	-1.62789	34.9531	44
					DNA duplex unwinding	-6.23957	-0.603737	10		Ubiquitin-dependent protein catabolic process	-4.3131	4.87724	33		Nucleosome assembly	-4.33122	60.1975	44
					Double-strand break repair	-1.23183	-0.867645	9		Vesicle-mediated transport	-2.0283	-26.8792	33		Regulation of apoptotic process	-1.35873	11.2356	42
					Regulation of mRNA stability	-7.53894	-0.244685	9		Protein folding	0.665279	-27.6827	30		Wnt signaling pathway	-1.48767	11.4025	32
										Nucleocytoplasmic transport	0.157155	26.1356	29		Ribosomal small subunit biogenesis	-0.554292	39.0305	31
										Ribosomal small subunit biogenesis	3.80175	25.256	29		Protein folding	4.06267	-15.1848	29
										mRNA transport	3.12285	17.4653	26		Cytoskeleton organization	2.61106	-3.18349	28
										DNA replication	-0.750273	6.13835	23		Positive regulation of transcription initiation by RNA polymerase II	0.208109	27.5307	28
										Response to oxidative stress	-2.78111	-21.9876	22		Double-strand break repair	2.59639	19.3033	26
										Mitotic cytokinesis	0.635167	3.95563	18		Telomere organization	-1.74485	47.238	26
										Regulation of double-strand break repair	-0.522526	14.0478	15		DNA-templated transcription	3.52827	14.2302	21
										Regulation of stem cell differentiation	-2.07555	12.8232	14		Endocytic recycling	-1.3376	-14.2399	21
										Regulation of cell fate specification	-2.55388	10.839	12		Nucleocytoplasmic transport	1.31987	20.5645	20
										Ribosome biogenesis	0.965384	6.94265	11		Proton motive force-driven mitochondrial ATP synthesis	-3.44417	-10.4407	18
										Purine nucleotide biosynthetic process	-1.43348	-7.43193	8		Positive regulation of cell differentiation	0.500941	14.0767	16
															Epigenetic regulation of gene expression	-0.42671	25.9275	15
															Fatty acid beta-oxidation	-1.93729	-11.2357	14
															Positive regulation of T cell differentiation	0.280928	13.9983	14
															Ribosome biogenesis	0.675859	11.5814	14
															Regulation of stem cell differentiation	-3.94109	15.4657	14
															Regulation of cell fate specification	-4.10239	14.6917	13
															Ribosomal large subunit biogenesis	1.4896	13.894	12
															Post-translational protein modification	-0.512708	-6.87627	11
GO CCs	CYT	NE	# Proteins		GO CCs	CYT	NE	# Proteins		GO CCs	CYT	NE	# Proteins		GO CCs	CYT	NE	# Proteins
Cytosol	-60.7329	11.4191	236		Cytosol	-84.8043	8.57698	367		Nucleus	-23.4833	135.185	743		Nucleus	-0.555119	400.261	937
Nucleus	-0.883529	28.8653	208		Membrane	-160.699	-2.14843	246		Nucleoplasm	-8.57168	270.422	736		Extracellular exosome	-18.0799	-186.123	378
Membrane	-128.012	-16.2488	164		Nucleus	-0.976307	29.1649	174		Extracellular exosome	-48.5131	-325.375	365		Nucleolus	1.3961	198.45	247
Mitochondrion	-23.2886	-19.7578	128		Extracellular exosome	-26.3359	5.34054	172		Mitochondrion	-13.5027	-134.168	225		Mitochondrion	-4.17376	-137.335	236
Extracellular exosome	-50.3138	-16.6987	93		Nucleoplasm	-4.44695	29.0441	152		Nucleolus	1.3807	104.56	185		Chromatin	-2.3552	131.008	152
Focal adhesion	-22.5861	-18.6111	77		Mitochondrion	-60.2958	-7.8587	144		Chromatin	-3.75905	92.3771	131		Protein-containing complex	-1.44075	38.3551	133
Nucleolus	-8.05643	24.6937	61		Endoplasmic reticulum	-28.5732	8.31648	82		Intracellular membrane-bounded organelle	-2.03806	-21.694	106		Nuclear speck	1.82392	93.926	120
Golgi apparatus	-29.6049	-11.4381	40		Focal adhesion	-17.0747	9.00544	65		Protein-containing complex	-2.89959	-21.9264	91		Intracellular membrane-bounded organelle	1.20723	2.09864	119
Chromosome	0.14824	-1.62384	25		Protein-containing complex	-12.0205	-3.65019	58		Nuclear speck	3.35548	55.6113	84		Centrosome	-1.49931	-3.46931	86
P-body	6.68628	22.6942	23		Perinuclear region of cytoplasm	-5.24959	8.90112	55		Focal adhesion	-5.94013	-55.9328	80		Chromosome	-0.370318	65.0875	79
Nuclear speck	-1.7456	-3.3222	23		Intracellular membrane-bounded organelle	-3.80024	8.64972	51		Cytoskeleton	2.24841	-23.7171	58		Chromosome, telomeric region	-6.2227	66.3296	65
Ribonucleoprotein complex	-0.867031	6.8647	22		Ribonucleoprotein complex	-24.7784	3.29664	46		Chromosome	0.03033	28.8211	57		Cytoskeleton	1.59729	-35.4008	63
Cytosolic ribosome	-12.532	3.52183	20		Centrosome	-15.7783	0.696341	36		Nuclear envelope	-0.598901	21.4505	57		Nuclear membrane	1.87746	30.7218	55
Microtubule	-8.56726	-1.41692	16		Cell surface	0.484823	0.755933	34		Ficolin-1-rich granule lumen	-4.90063	-29.2645	42		Spliceosomal complex	1.63053	38.9013	51
Actin cytoskeleton	-14.8773	-2.61155	15		Proteasome complex	3.8377	37.6952	29		Endosome	-1.99759	-21.451	40		Ficolin-1-rich granule lumen	-1.84602	-16.5299	48
Microtubule organizing center	-10.4273	-3.48068	8		Ficolin-1-rich granule lumen cyt	8.74226	23.9932	26		Lysosome	-2.89428	-44.7323	39		Kinetochore	0.30874	35.1788	48
Site of double-strand break	-3.941	-4.70753	8		Cytoplasmic stress granule	-16.406	4.82219	19		Microtubule cytoskeleton	1.60472	-18.238	39		Endosome	3.61715	-26.2325	46
MCM complex	0.518408	-5.80195	6		Chromosome, telomeric region NE	-11.837	-12.8908	13		Chromosome, telomeric region	-5.3537	30.3591	39		Nucleosome	-1.54039	67.6476	45
					Azurophil granule lumen	3.773	-1.13669	12		Ribonucleoprotein complex	3.07261	3.51131	36		Secretory granule lumen	-0.366664	-10.6488	39
					Spliceosomal complex	-1.03956	-3.40203	9		Kinetochore	1.56732	23.6482	36		Proteasome complex	1.34964	31.8794	37
										Fibrillar center	1.30967	22.1028	35		Small-subunit processome	-0.531813	46.4661	35
										Spliceosomal complex	2.7006	22.0331	34		Site of double-strand break	0.826144	12.5925	33
										Small-subunit processome	4.90502	29.5096	33		Ribonucleoprotein complex	-4.99155	4.56622	33
										Proteasome complex	0.474614	12.1799	33		Cytosol	1.169	2.59741	27
										Vesicle	-2.73846	-24.1029	28		Vesicle	1.18932	-26.4072	27
										Azurophil granule lumen	-3.75492	-24.9389	25		Chromosome, centromeric region	1.83532	19.0895	25
										Transcription repressor complex	-2.70548	12.8307	18		P-body	-0.418137	-0.792002	21
										Lipid droplet	-1.31072	-14.4413	17		Transcription repressor complex	-1.37964	12.2347	15
										Chromosome, centromeric region	2.24992	9.2607	17		Exosome (RNase complex)	0.609328	6.53084	13
										SCAR complex	0.898252	-5.9567	9		Protein folding chaperone complex	4.66878	-4.98915	11
										Condensin complex	1.67814	1.39054	9		Focal adhesion	-3.435	-0.563526	8
KEGG Pathways	CYT	NE	# Proteins		KEGG Pathways	CYT	NE	# Proteins		KEGG Pathways	CYT	NE	# Proteins		KEGG Pathways	CYT	NE	# Proteins
Proteasome	1.7927	39.0183	24		Ribosome	-52.7293	-4.74872	41		Nucleocytoplasmic transport	0.820971	34.4775	41		Spliceosome	2.26262	52.8083	65
Ribosome	-13.9052	1.79695	20		Protein processing in endoplasmic reticulum	25.8856	19.5557	31		ATP-dependent chromatin remodeling	-1.84871	35.7952	40		ATP-dependent chromatin remodeling	-2.0799	67.4651	62
Ribosome biogenesis in eukaryotes	-0.942574	16.7579	18		Proteasome	4.94797	35.6401	23		Ribosome biogenesis in eukaryotes	1.8846	28.8561	37		Endocytosis	-1.70887	-37.6595	60
Cell cycle	-1.055	-10.0668	13		RNA degradation	-8.80527	-5.96908	18		Cell cycle	-3.30191	19.2145	32		Ribosome biogenesis in eukaryotes	-1.22069	49.0267	47
Nucleocytoplasmic transport	-8.55129	-4.7429	11		Apoptosis	5.02609	-0.729171	15		Proteasome	-0.151924	16.7586	31		Cell cycle	-1.11043	29.9806	47
					Cellular senescence	-0.243514	-3.08659	11		Biosynthesis of cofactors	2.83005	-31.7001	30		Nucleocytoplasmic transport	2.04808	31.0041	42
					Ferroptosis	5.48735	1.80037	8		Biosynthesis of amino acids	-5.39561	-32.4002	27		Regulation of actin cytoskeleton	0.904216	-36.8508	42
										Apoptosis	2.51599	-20.5685	26		Proteasome	1.79652	33.9225	36
										Polycomb repressive complex	-2.881	16.9884	18		Polycomb repressive complex	-0.657556	21.0456	25
										Basal transcription factors	-1.02948	10.6301	13		Biosynthesis of amino acids	-3.22736	-24.1349	24
															mRNA surveillance pathway	1.84972	14.8314	23
															RNA polymerase	1.89503	11.1228	13
															Homologous recombination	0.284361	12.1151	13

## Sheet: BP discussion
Common BPs in all 4 treatments						Specific for Ru
Proteasome-mediated ubiquitin-dependent protein catabolic process						Cell cycle
rRNA processing						mRNA transport
Ribosomal small subunit biogenesis
Specific for Ethyl						Specific for Os
Translation						na
Stress granule assembly
Specific for Morpholine						Specific for 1a
Negative regulation of DNA-templated transcription						DNA unwinding involved in DNA replication
DNA repair
Cell division						Specific for 1b
DNA damage response						Ubiquitin-dependent protein catabolic process
mRNA splicing, via spliceosome						Vesicle-mediated transport
Intracellular protein transport						Mitotic cytokinesis
RNA splicing						Regulation of double-strand break repair
Protein stabilization						Purine nucleotide biosynthetic process
Chromatin organization
Regulation of apoptotic process						Specific for 2a
Nucleocytoplasmic transport						Negative regulation of apoptotic process
Regulation of stem cell differentiation						Negative regulation of translation
Regulation of cell fate specification						Cellular response to heat
						Protein K48-linked ubiquitination
						Cellular response to oxidative stress
						Macroautophagy
						DNA duplex unwinding
						Regulation of mRNA stability
						Specific for 2b
						Chromatin remodeling
						Transcription by RNA polymerase II
						Nucleosome assembly
						Wnt signaling pathway
						Cytoskeleton organization
						Positive regulation of transcription initiation by RNA polymerase II
						Telomere organization
						DNA-templated transcription
						Endocytic recycling
						Proton motive force-driven mitochondrial ATP synthesis
						Positive regulation of cell differentiation
						Epigenetic regulation of gene expression
						Fatty acid beta-oxidation
						Positive regulation of T cell differentiation
						Ribosomal large subunit biogenesis
						Post-translational protein modification
